# Supplementary material
Source: Springer Nature journal article supplement (https://www.springermedizin.de/resource/supplementary/12911_2012_569_MOESM1_ESM.pdf/9525902)
Supplement: MOESM1 [file 9525902]

Pathologischer Befund Prostatakarzinom

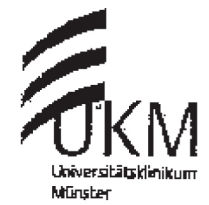

Name:

Geb. Dat.

J. Nr.

Prostatazentrum  
am UKM

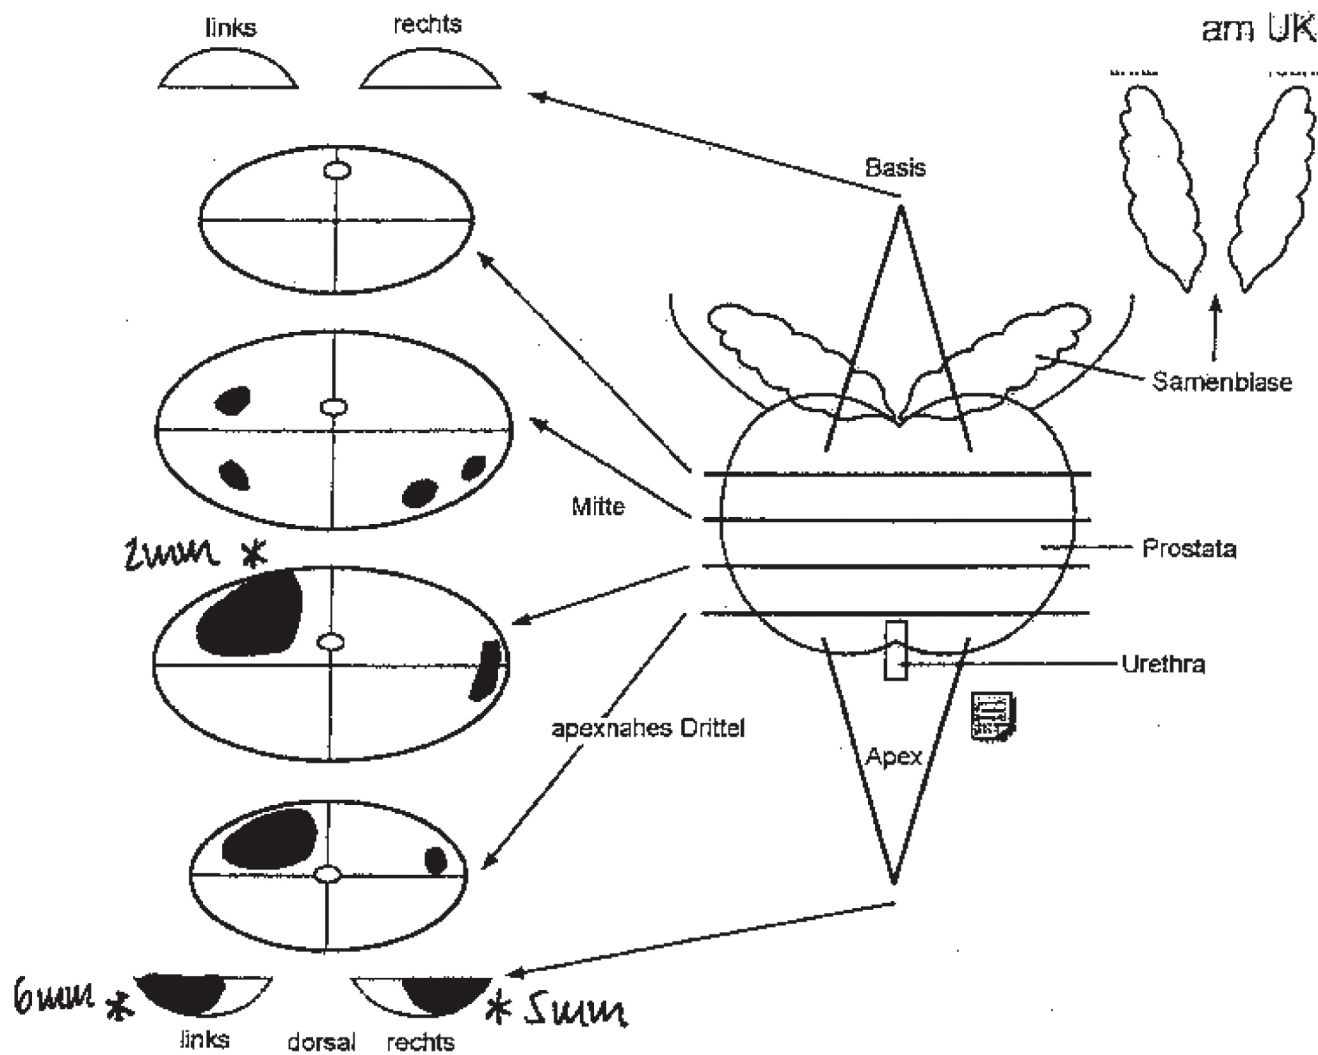

|                                                                                                                                                                                                 |                                                                                                                                                                                                                                                 |  |                                                                                                                                                              |  |
|-------------------------------------------------------------------------------------------------------------------------------------------------------------------------------------------------|-------------------------------------------------------------------------------------------------------------------------------------------------------------------------------------------------------------------------------------------------|--|--------------------------------------------------------------------------------------------------------------------------------------------------------------|--|
| <p><b>P</b> Prostatische Intraepitheliale Neoplasie (PIN) 3°</p> <p>● Adenokarzinom</p> <p>⌒ Kapselinvasion</p> <p>⌒ Extraprostatische Ausbreitung</p> <p>* positiver chirurg. Schnitttrand</p> | <p><i>Differenzierungsmuster</i></p> <p><input type="checkbox"/> hoch differenziert 0</p> <p><input type="checkbox"/> wenig differenziert 1</p> <p><input type="checkbox"/> kribiform 2</p> <p><input checked="" type="checkbox"/> solide 3</p> |  | <p><i>Kernatypie</i></p> <p><input type="checkbox"/> gering 0</p> <p><input type="checkbox"/> mäßig 1</p> <p><input checked="" type="checkbox"/> stark 2</p> |  |
|                                                                                                                                                                                                 | <p>la = 0 lb = 1 lla = 2 llb = 3 llla = 4 ll lb = 5</p>                                                                                                                                                                                         |  |                                                                                                                                                              |  |
| <p>pT: 2c</p> <p>pN: 0 (0/5)</p>                                                                                                                                                                | <p>Gleason Score: 5+3 = 8<br/>(2,4)</p>                                                                                                                                                                                                         |  | <p>Malignitäts Grad (Helpap): III b</p>                                                                                                                      |  |
